# Supplementary material for: A bispyrene derivative as a selective fluorescent probe for RNA
Source: Royal Society of Chemistry journal article supplement (doi:10.1039/c3cc49430f), 2014-01-01
Supplement: c3cc49430f.pdf [file c3cc49430f.pdf]

## Supporting Information for

# “A Bispyrene Derivative as a Selective Fluorescent Probe for RNA”

Yifan Liu,<sup>a</sup> Eun Jin Jun,<sup>a</sup> Gyoungmi Kim,<sup>a</sup> Ae-Ree Lee,<sup>b</sup> Joon-Hwa Lee,<sup>b\*</sup> and  
Juyoung Yoon<sup>a\*</sup>

<sup>a</sup>Department of Chemistry and Nano Science, Global Top 5 research program, Ewha Womans University, Seoul 120-750, Korea; <sup>b</sup>Department of Chemistry and RINS, Gyeongsang National University, Jinju, Gyeongnam 660-701, Korea Department of Chemistry.

[jyoon@ewha.ac.kr](mailto:jyoon@ewha.ac.kr); [joonhwa@gnu.ac.kr](mailto:joonhwa@gnu.ac.kr)

|                                          |    |
|------------------------------------------|----|
| Experiment Section.....                  | S1 |
| Characterization of probe <b>1</b> ..... | S4 |
| Spectrum analysis.....                   | S7 |
| Reference.....                           | S8 |

## 1. Experiment Section

**General Consideration:** All materials used for synthesis were obtained from Aldrich-Sigma or TCI. All organic solvents for synthesis were of analytical grade and were obtained commercially. They were used without further purification. All reactions were monitored by thin-layer chromatography (TLC) with 0.25-mm Merck silica gel plates (60F-254) under irradiation by UV-lamp (254 nm). Merck Millipore silica gel (230-400 mesh) was used in the column-chromatography purification. <sup>1</sup>H NMR and <sup>13</sup>C NMR spectra were recorded on a Bruker Avance 300 MHz spectrometer using tetramethylsilane as an internal standard. Mass spectra were measured on a JMS-HX 110A/110A Tandem Mass Spectrometer (JEOL). Absorption spectra were recorded in a 10 × 10-mm quartz cuvettes (HELLMA; type number 100-QS) on a Thermo Fisher Scientific Evolution 201 UV/Visible spectrophotometer under the control of a PC system (Windows 8) with the professional software supplied by the

manufacturer. Fluorescence spectra were measured in a 10 × 10 mm disposable cuvette (HELLMA; type number 101.650-QG) on a RF-5301/PC spectrofluorophotometer (Shimadzu) controlled by a PC (Windows XP) running software provided by the manufacturer.

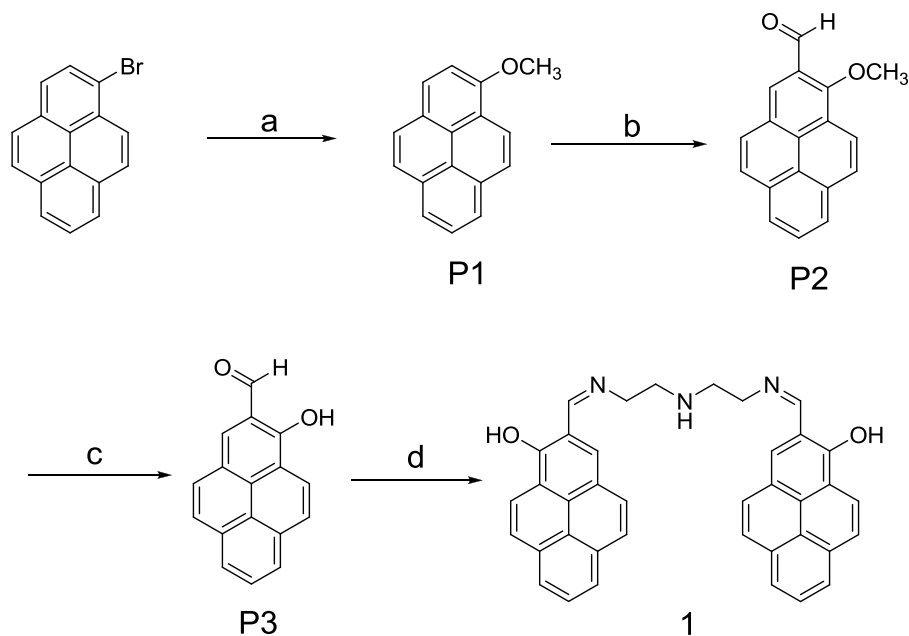

**Scheme S1.** Reagents and conditions: (a) Na, CuI, MeOH, reflux, 36h, 60%; (b) n-butyllithium, 0°C; tetramethylethylenediamine, 4h; DMF, 22h, 30%; (c) AlCl<sub>3</sub>, CH<sub>2</sub>Cl<sub>2</sub>, room temperature, 4h, 72%; (d) diethylenetriamine, CH<sub>2</sub>Cl<sub>2</sub>, room temperature, 24h, 80%.

### Synthesis of P1

1-bromo-pyrene (5 g, 18 mmol) and CuI (0.38 g, 2 mmol) were mixed in the fresh sodium methylate solution and were refluxed for 36 hours under N<sub>2</sub>. The above mixture was quenched by 300 ml cool water and then acidified to pH=1 by 2 M HCl. The light brown precipitate was filtered and washed with water. The product was purified by silica column chromatography using a hexane/dichloromethane mixture (20:1) as eluent. Then recrystallized in ethanol to get **P1** as light yellow solid. Yield: 2.5 g (60 %) <sup>1</sup>H NMR (CDCl<sub>3</sub>, 300 MHz) δ (ppm): 4.18 (s, 1H), 7.54-7.57 (d, 1H), 7.86-8.22 (m, 7H), 8.43-8.47 (d, 1H).

### Synthesis of P2

1.6M butyl-lithium (10.9 mL, 18 mmol) was added slowly to the solution of compound **P1** (4.1 g, 17.6 mmol) in 70 mL dry hexane under N<sub>2</sub> at 0 °C. Then tetramethyl-ethylerediamine (2.66 mL) was injected to the above solution, then the solution color changed to red. After 4 hours, DMF (1.63 mL, 56 mmol) was added by syringe, and the mixture was continue stirred

for 22 hours at room temperature. Finally the reaction was stopped by adding 0.5 M HCl. Then the hexane was removed by evaporation to get yellow solid. And the solid was washed with water and extracted with dichloromethane. The organic phase was dried over Na<sub>2</sub>SO<sub>4</sub>. The solvent was evaporated out and the residue was purified by silica column chromatography using dichloromethane as eluent to obtain **P2** as yellow powder. Yield: 1.4 g (30 %) <sup>1</sup>H NMR (CDCl<sub>3</sub>, 300 MHz) δ (ppm): 4.19 (s, 1H), 8.06-8.11 (m, 6H), 8.39-8.43 (m, H), 8.61 (s, 1H), 10.83 (s, 1H).

### Synthesis of **P3**

compound **P2** (3 g, 11.4 mmol) dissolved in 30 mL dry CH<sub>2</sub>Cl<sub>2</sub> was added to the solution of AlCl<sub>3</sub> (6 g, 45 mmol) in 40 mL dry CH<sub>2</sub>Cl<sub>2</sub> at 0°C. Then the solution was stirred at room temperature. 4 hours later, 0.1 M HCl was added to the red mixture. The mixture extracted with dichloromethane, and the organic phase was dried over Na<sub>2</sub>SO<sub>4</sub>. The solvent was evaporated and the residue was purified by silica column chromatography using dichloromethane as eluent to obtain **P3** as yellow powder. Yield: 2 g (72 %) <sup>1</sup>H NMR (CDCl<sub>3</sub>, 300 MHz) δ (ppm): 7.79-8.12 (m, 7H), 8.44-8.47 (d, H), 10.27 (s, 1H), 11.88 (s, 1H).

### Synthesis of **1**

The crude **P3** (100mg, 0.41mmol) was dissolved in CH<sub>2</sub>Cl<sub>2</sub> and diethylenetriamine (0.02mL, 0.20mmol) was added to the reaction mixture. The reaction mixture was stirred at RT for 12h and a precipitate was formed. The precipitate was filtered and washed with cold CH<sub>2</sub>Cl<sub>2</sub> to give **1** as a red solid. Yield: 181mg (80%). m.p. = 203°C <sup>1</sup>H NMR (CDCl<sub>3</sub>, 300 MHz) δ (ppm): 14.37 (s, OH), 8.70 (s, 2H), 8.23 (d, *J* = 9.34 Hz, 2H), 7.92-7.85 (m, 6H), 7.73 (d, *J* = 7.73 Hz, 4H), 7.56 (s, 4H), 3.89 (s, 4H), 3.16 (s, 4H), 1.39 (s, NH). <sup>13</sup>C NMR (CDCl<sub>3</sub>, 62.5 MHz) : δ 132.78, 132.49, 127.26, 127.00, 126.30, 124.74, 124.27, 124.18, 119.87, 115.36, 113.41, 15.76, 12.48, 11.99. HRMS (FAB) calcd for C<sub>38</sub>H<sub>30</sub>N<sub>3</sub>O<sub>2</sub> [M+H]<sup>+</sup> 560.2260; found 560.2335

## 2. Characterization of Probe 1:

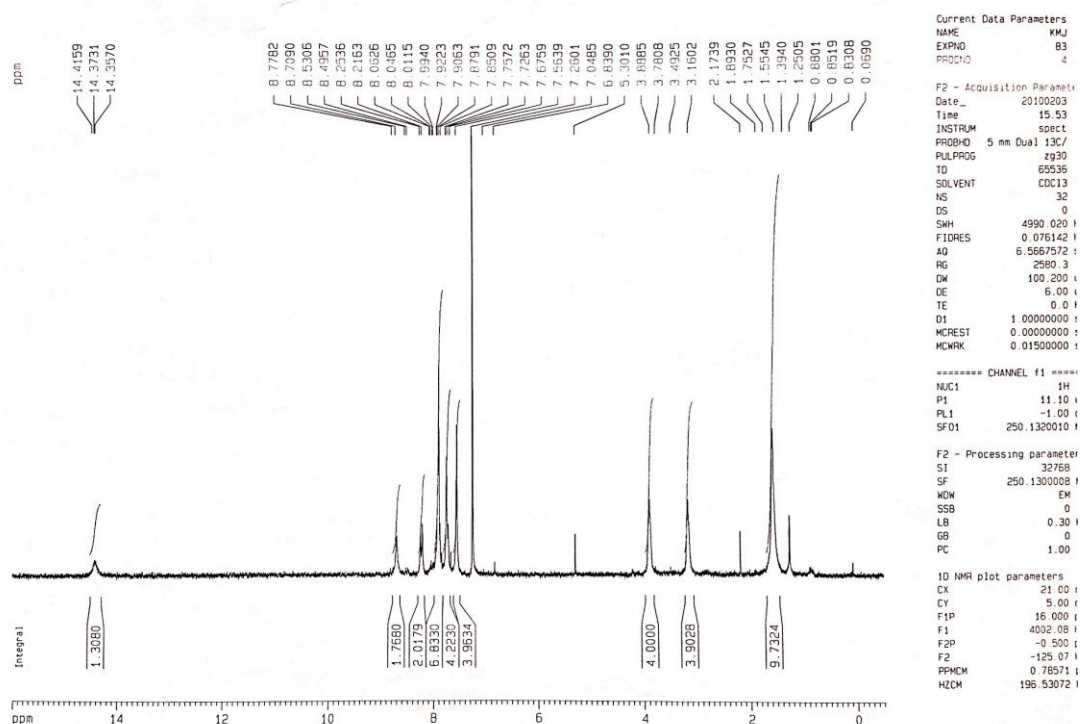

Figure S1.  $^1\text{H}$  NMR spectra of **1** in  $\text{CDCl}_3$ .

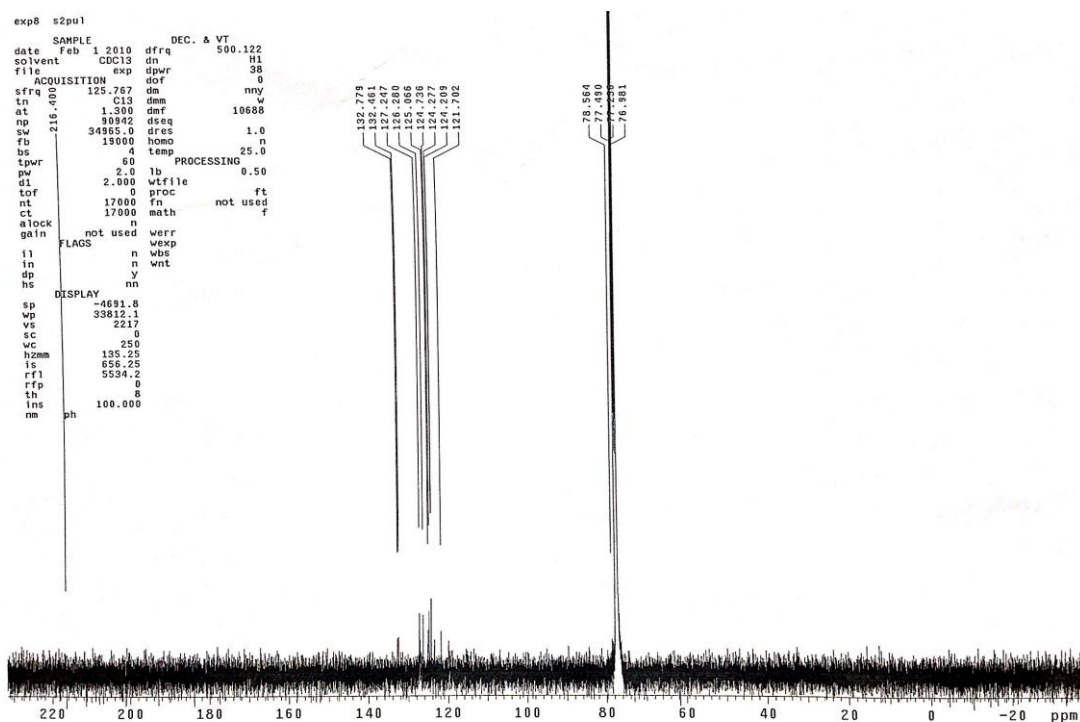

Figure S2.  $^{13}\text{C}$  NMR spectra of **1** in  $\text{CDCl}_3$ .

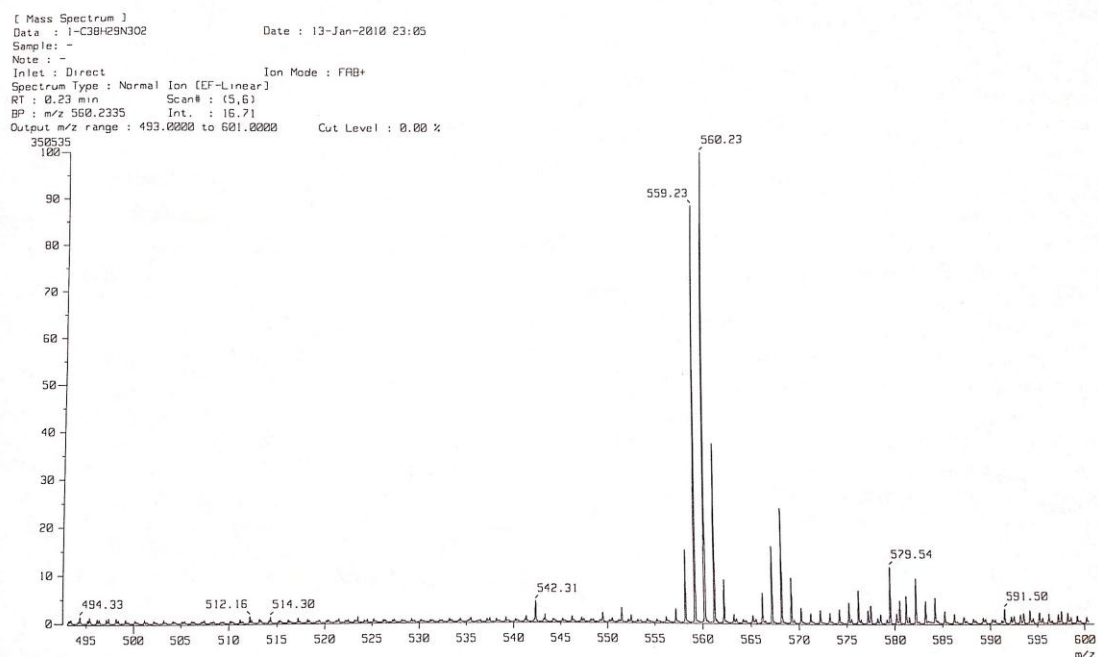

**Figure S3.** HRMS (FAB) spectra of **1**.

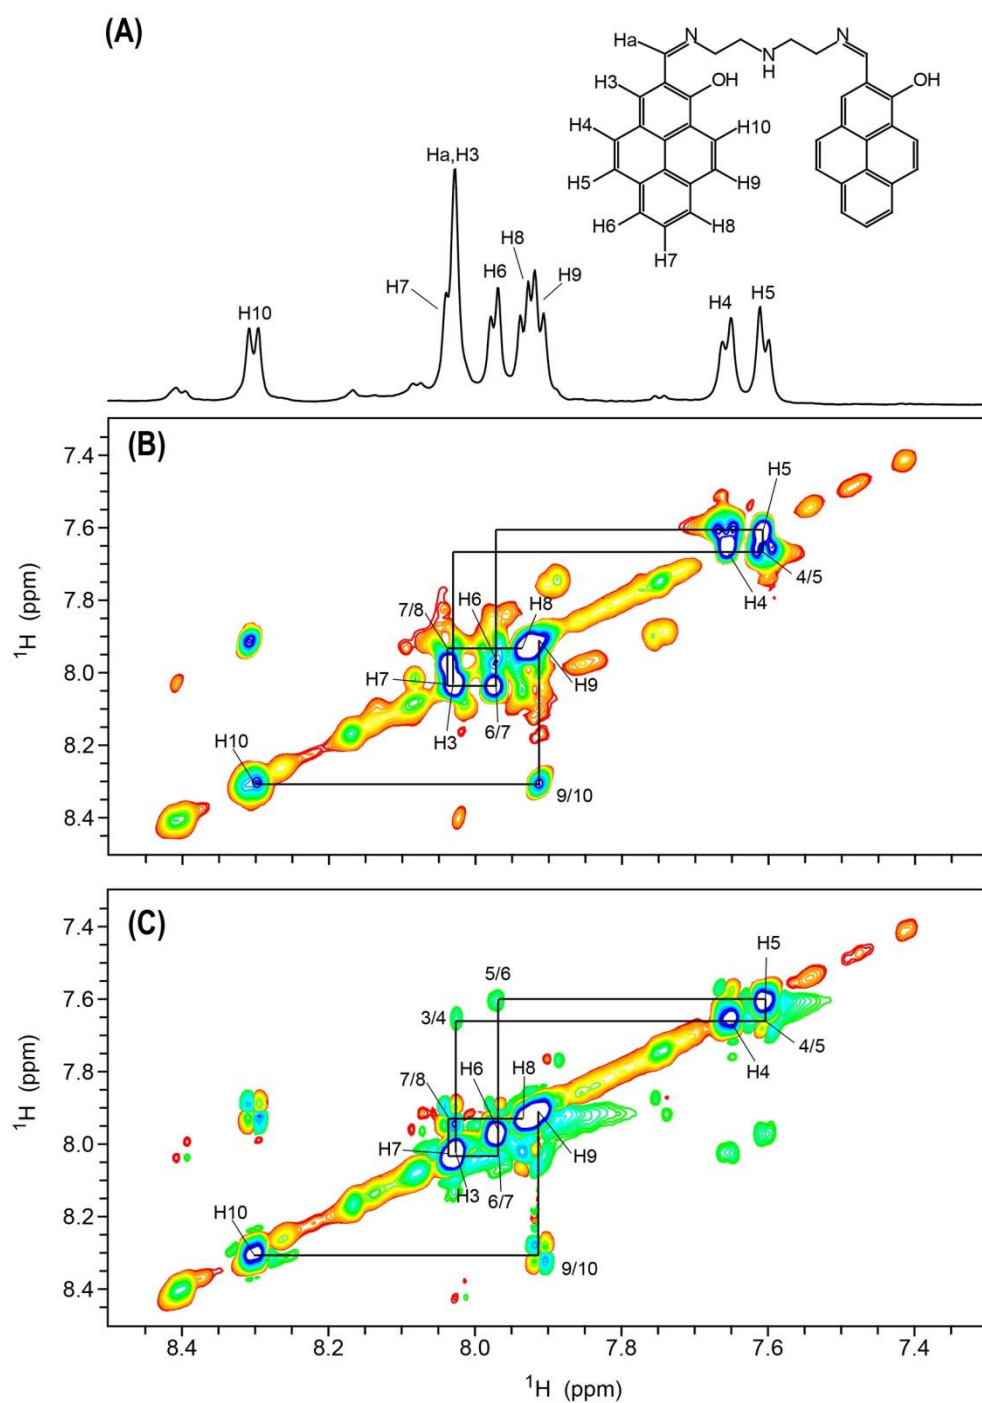

**Figure S4.** (A) Expanded 1D NMR spectrum of the **1** dissolved in DMSO-*d*<sub>6</sub> at 25 °C. Chemical structure of **1** is shown to the upper-right of spectrum. (B) Expanded TOCSY (mixing time: 80 ms) and (C) ROESY (mixing time: 250 ms) spectra of the **1** dissolved in DMSO-*d*<sub>6</sub> at 25 °C.

### 3. Spectrum analysis:

Stock solution of **1** (2 mM) was prepared in DMSO, which was then diluted to 20  $\mu\text{M}$  in Tris-HCl buffer at pH 7.4. DNA and RNA were dissolved in deionized water and the concentration were determined from extinction coefficient at 260 nm using a UV-vis spectrophotometer.<sup>1</sup>

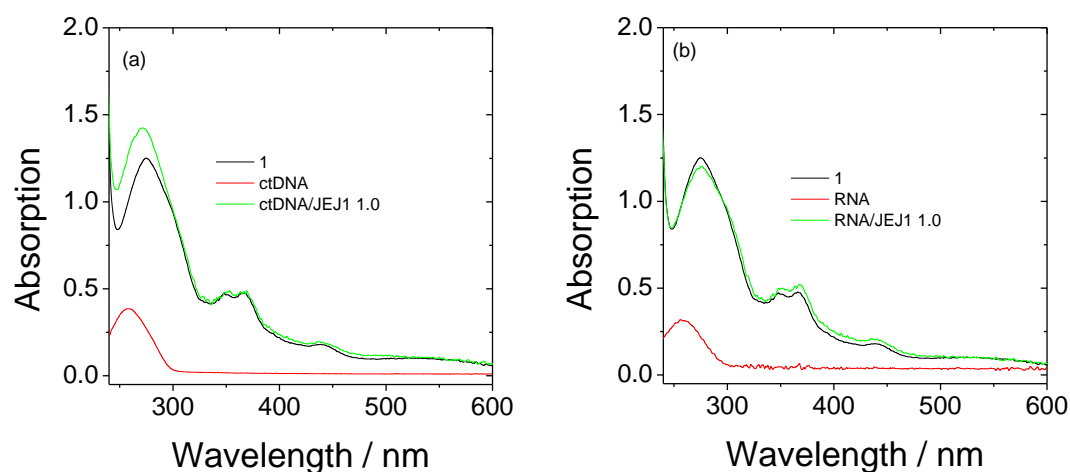

**Figure S5.** Absorption spectra of 20  $\mu\text{M}$  **1**, ctDNA, RNA and the interaction of **1** with nucleic acid (mole ratios<sub>[base pairs]/[1]</sub> = 1.0) are shown in (a), (b), in 0.05 M Tris-HCl (pH 7.4).

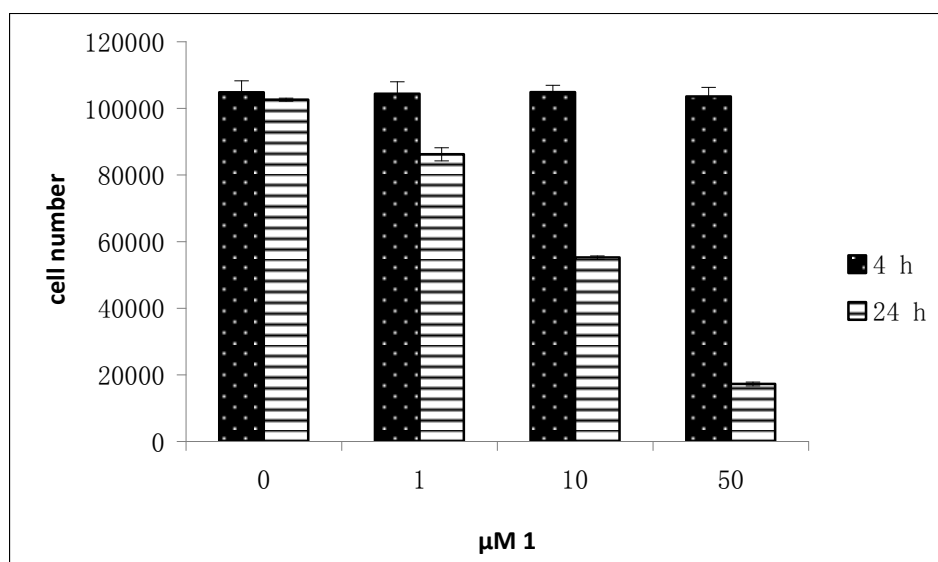

**Figure S6.** Cytotoxic effects of **1**. HeLa cells treated with 0, 1, 10, 50  $\mu\text{M}$  **1** for 4, 24 h and counted the cell number. Results are expressed as mean  $\pm$  standard deviation of three independent experiments.

#### 4. Reference:

- (1) Balapanuru ,J.; Yang, J.X.; Xiao, S.; Bao, Q.; Jahan, M.; Polavarapu, L.; Wei, J.; Xu ,Q.H.; Loh, K. P.  
*Angew. Chem. Int. Ed.* **2010**, *49*, 6549 –6553.
